# Supplementary material for: Conducting Polymer-Based Cantilever Sensors for Detection Humidity
Source: Hindawi journal article supplement (doi:10.1155/2018/4782685), 2018-06-05

## Graphical Abstract

The Figure 1 shows the cantilever behavior (deflection - nm) when submitted at different humidity's using dry and wet nitrogen gas. The high sensitivity can be due the tensile and compressive interfacial stress change of the adsorption/desorption molecules by the conducting polymer deposited over the cantilever surface.

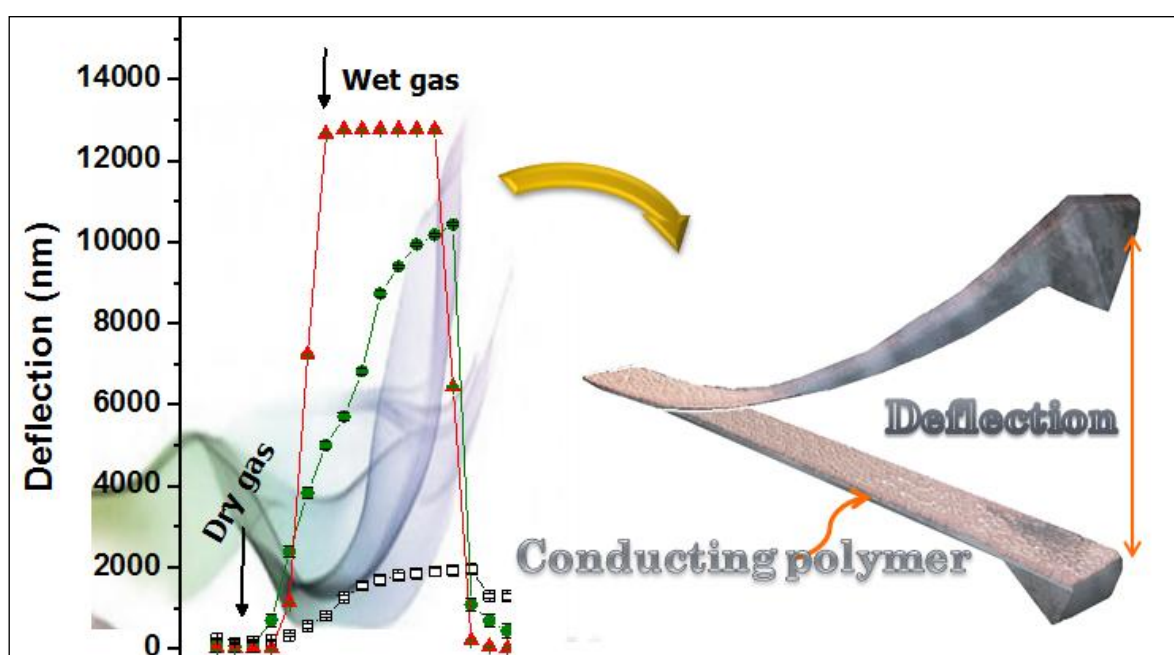

Supplement: f1 [file 4782685.f1.pdf]
